# Supplementary material for: Influence of Core Thickness and Boundary Condition on the Modal Characteristics of Composite Structure with Metallic Damping Core
Source: Hindawi journal article supplement (doi:10.1155/2020/9720167), 2020-09-19
Supplement: f1 [file 9720167.f1.docx]

**Appendix.**

**Table 1.** Displacement deviation at measure points (D1~D12) under different boundary conditions: **(a)** measure point D1; **(b)** measure point D2; **(c)** measure point D3; **(d)** measure point D4; **(e)** measure point D5; **(f)** measure point D6; **(g)** measure point D7; **(h)** measure point D8; **(i)** measure point D9; **(j)** measure point D10; **(k)** measure point D11; **(l)** measure point D12; (unit: μm)

| Measure point D1 | | | | | | | | | | | | |
| --- | --- | --- | --- | --- | --- | --- | --- | --- | --- | --- | --- | --- |
| Boundary conditions | First order | | | | Second order | | | | Third order | | | |
| Result | Mean value | Standard deviation | Significant | Result | Mean value | Standard deviation | Significant | Result | Mean value | Standard deviation | Significant |
| C-C-F-F | 31.841 | 31.94 | 0.073 | ＜0.05 | 5.164 | 5.09 | 0.091 | ＜0.05 | 1.132 | 1.01 | 0.134 | ＜0.05 |
| 32.001 | 5.087 | 0.943 |
| 31.897 | 5.116 | 1.185 |
| 31.949 | 5.143 | 0.927 |
| 32.011 | 4.938 | 0.886 |
| C-C-C-F | 31.517 | 31.56 | 0.035 | ＜0.05 | 5.145 | 5.07 | 0.092 | ＜0.05 | 0.983 | 0.86 | 0.137 | ＜0.05 |
| 31.538 | 5.069 | 0.782 |
| 31.581 | 5.096 | 1.035 |
| 31.563 | 5.127 | 0.768 |
| 31.605 | 4.911 | 0.736 |
| C-C-C-C | 32.142 | 32.26 | 0.113 | ＜0.05 | 4.853 | 4.79 | 0.076 | ＜0.05 | 1.588 | 1.45 | 0.098 | ＜0.05 |
| 32.367 | 4.776 | 1.373 |
| 32.344 | 4.875 | 1.516 |
| 32.121 | 4.684 | 1.402 |
| 32.318 | 4.778 | 1.364 |

**(a)**

| Measure point D2 | | | | | | | | | | | | |
| --- | --- | --- | --- | --- | --- | --- | --- | --- | --- | --- | --- | --- |
| Boundary conditions | First order | | | | Second order | | | | Third order | | | |
| Result | Mean value | Standard deviation | Significant | Result | Mean value | Standard deviation | Significant | Result | Mean value | Standard deviation | Significant |
| C-C-F-F | 31.672 | 31.86 | 0.182 | ＜0.05 | 5.015 | 5.04 | 0.143 | ＜0.05 | 1.131 | 0.99 | 0.097 | ＜0.05 |
| 31.696 | 4.978 | 0.953 |
| 31.925 | 5.286 | 1.053 |
| 31.964 | 4.982 | 0.911 |
| 32.088 | 4.933 | 0.907 |
| C-C-C-F | 31.466 | 31.49 | 0.027 | ＜0.05 | 5.227 | 5.22 | 0.107 | ＜0.05 | 0.793 | 0.82 | 0.144 | ＜0.05 |
| 31.523 | 5.146 | 0.758 |
| 31.458 | 5.269 | 1.072 |
| 31.508 | 5.087 | 0.762 |
| 31.499 | 5.376 | 0.713 |
| C-C-C-C | 31.342 | 32.31 | 0.147 | ＜0.05 | 5.035 | 5.04 | 0.154 | ＜0.05 | 1.594 | 1.62 | 0.142 | ＜0.05 |
| 31.174 | 4.978 | 1.556 |
| 31.432 | 5.306 | 1.873 |
| 31.462 | 4.962 | 1.564 |
| 31.148 | 4.917 | 1.517 |

**(b)**

| Measure point D3 | | | | | | | | | | | | |
| --- | --- | --- | --- | --- | --- | --- | --- | --- | --- | --- | --- | --- |
| Boundary conditions | First order | | | | Second order | | | | Third order | | | |
| Result | Mean value | Standard deviation | Significant | Result | Mean value | Standard deviation | Significant | Result | Mean value | Standard deviation | Significant |
| C-C-F-F | 31.722 | 31.77 | 0.061 | ＜0.05 | 5.115 | 5.03 | 0.112 | ＜0.05 | 1.113 | 0.99 | 0.137 | ＜0.05 |
| 31.755 | 4.928 | 0.912 |
| 31.854 | 5.176 | 1.165 |
| 31.797 | 4.992 | 0.898 |
| 31.703 | 4.947 | 0.866 |
| C-C-C-F | 31.527 | 31.44 | 0.056 | ＜0.05 | 5.356 | 5.27 | 0.113 | ＜0.05 | 1.313 | 1.06 | 0.202 | ＜0.05 |
| 31.475 | 5.167 | 1.022 |
| 31.394 | 5.412 | 1.235 |
| 31.402 | 5.237 | 0.888 |
| 31.415 | 5.186 | 0.856 |
| C-C-C-C | 32.487 | 32.29 | 0.125 | ＜0.05 | 5.024 | 4.94 | 0.095 | ＜0.05 | 1.722 | 1.71 | 0.117 | ＜0.05 |
| 32.189 | 4.862 | 1.678 |
| 32.225 | 5.055 | 1.906 |
| 32.237 | 4.925 | 1.642 |
| 32.376 | 4.842 | 1.606 |

**(c)**

| Measure point D4 | | | | | | | | | | | | |
| --- | --- | --- | --- | --- | --- | --- | --- | --- | --- | --- | --- | --- |
| Boundary conditions | First order | | | | Second order | | | | Third order | | | |
| Result | Mean value | Standard deviation | Significant | Result | Mean value | Standard deviation | Significant | Result | Mean value | Standard deviation | Significant |
| C-C-F-F | 30.806 | 30.72 | 0.062 | ＜0.05 | 5.182 | 5.11 | 0.083 | ＜0.05 | 1.083 | 1.12 | 0.146 | ＜0.05 |
| 30.763 | 5.104 | 1.038 |
| 30.659 | 5.137 | 1.372 |
| 30.677 | 5.159 | 1.072 |
| 30.703 | 4.972 | 1.013 |
| C-C-C-F | 31.436 | 31.45 | 0.043 | ＜0.05 | 5.413 | 5.33 | 0.086 | ＜0.05 | 1.016 | 1.13 | 0.183 | ＜0.05 |
| 31.523 | 5.374 | 1.226 |
| 31.455 | 5.381 | 1.412 |
| 31.407 | 5.255 | 1.002 |
| 31.448 | 5.206 | 1.008 |
| C-C-C-C | 32.298 | 32.22 | 0.118 | ＜0.05 | 5.032 | 4.97 | 0.082 | ＜0.05 | 1.392 | 1.32 | 0.134 | ＜0.05 |
| 32.116 | 5.006 | 1.323 |
| 32.089 | 4.958 | 1.495 |
| 32.336 | 5.019 | 1.207 |
| 32.297 | 4.827 | 1.166 |

**(d)**

| Measure point D5 | | | | | | | | | | | | |
| --- | --- | --- | --- | --- | --- | --- | --- | --- | --- | --- | --- | --- |
| Boundary conditions | First order | | | | Second order | | | | Third order | | | |
| Result | Mean value | Standard deviation | Significant | Result | Mean value | Standard deviation | Significant | Result | Mean value | Standard deviation | Significant |
| C-C-F-F | 31.832 | 31.82 | 0.124 | ＜0.05 | 5.045 | 5.08 | 0.137 | ＜0.05 | 1.041 | 0.97 | 0.133 | ＜0.05 |
| 31.884 | 5.013 | 0.973 |
| 31.601 | 5.322 | 1.146 |
| 31.903 | 5.007 | 0.843 |
| 31.874 | 5.015 | 0.837 |
| C-C-C-F | 31.505 | 31.49 | 0.022 | ＜0.05 | 5.388 | 5.31 | 0.094 | ＜0.05 | 0.972 | 0.96 | 0.116 | ＜0.05 |
| 31.468 | 5.292 | 0.928 |
| 31.498 | 5.346 | 1.156 |
| 31.461 | 5.368 | 0.892 |
| 31,509 | 5.156 | 0.861 |
| C-C-C-C | 32.038 | 31.93 | 0.094 | ＜0.05 | 4.847 | 4.83 | 0.106 | ＜0.05 | 1.545 | 1.67 | 0.187 | ＜0.05 |
| 31.887 | 4.756 | 1.778 |
| 31.802 | 4.849 | 1.943 |
| 31.899 | 4.707 | 1.532 |
| 31.998 | 4.985 | 1.548 |

**(e)**

| Measure point D6 | | | | | | | | | | | | |
| --- | --- | --- | --- | --- | --- | --- | --- | --- | --- | --- | --- | --- |
| Boundary conditions | First order | | | | Second order | | | | Third order | | | |
| Result | Mean value | Standard deviation | Significant | Result | Mean value | Standard deviation | Significant | Result | Mean value | Standard deviation | Significant |
| C-C-F-F | 31.875 | 31.79 | 0.153 | ＜0.05 | 5.034 | 5.02 | 0.224 | ＜0.05 | 1.343 | 1.08 | 0.212 | ＜0.05 |
| 31.977 | 5.025 | 1.012 |
| 31.672 | 4.986 | 1.265 |
| 31.846 | 5.012 | 0.928 |
| 31.613 | 5.047 | 0.856 |
| C-C-C-F | 31.538 | 31.55 | 0.016 | ＜0.05 | 5.482 | 5.41 | 0.083 | ＜0.05 | 1.342 | 1.27 | 0.134 | ＜0.05 |
| 31.559 | 5.475 | 1.273 |
| 31.559 | 5.327 | 1.445 |
| 31.568 | 5.453 | 1.157 |
| 31.531 | 5.312 | 1.116 |
| C-C-C-C | 32.166 | 32.18 | 0.157 | ＜0.05 | 5.234 | 5.22 | 0.233 | ＜0.05 | 1.813 | 1.75 | 0.143 | ＜0.05 |
| 32.357 | 5.225 | 1.678 |
| 32.045 | 5.186 | 1.988 |
| 32.017 | 5.212 | 1.682 |
| 32.319 | 5.247 | 1.636 |

**(f)**

| Measure point D7 | | | | | | | | | | | | |
| --- | --- | --- | --- | --- | --- | --- | --- | --- | --- | --- | --- | --- |
| Boundary conditions | First order | | | | Second order | | | | Third order | | | |
| Result | Mean value | Standard deviation | Significant | Result | Mean value | Standard deviation | Significant | Result | Mean value | Standard deviation | Significant |
| C-C-F-F | 31.514 | 31.55 | 0.115 | ＜0.05 | 5.102 | 5.04 | 0.068 | ＜0.05 | 1.066 | 1.03 | 0.107 | ＜0.05 |
| 31.696 | 5.066 | 0.901 |
| 31.413 | 5.012 | 1.048 |
| 31.476 | 5.079 | 0.942 |
| 31.645 | 4.937 | 1.179 |
| C-C-C-F | 31.522 | 31.52 | 0.047 | ＜0.05 | 5.442 | 5.43 | 0.117 | ＜0.05 | 1.463 | 1.18 | 0.246 | ＜0.05 |
| 31.519 | 5.398 | 1.112 |
| 31.522 | 5.626 | 1.415 |
| 31.527 | 5.362 | 1.008 |
| 31.516 | 5.326 | 0.926 |
| C-C-C-C | 32.162 | 32.44 | 0.201 | ＜0.05 | 5.365 | 5.31 | 0.162 | ＜0.05 | 1.892 | 1.82 | 0.126 | ＜0.05 |
| 32.557 | 5.248 | 1.823 |
| 32.616 | 5.576 | 1.995 |
| 32.582 | 5.202 | 1.707 |
| 32.298 | 5.176 | 1.696 |

**(g)**

| Measure point D8 | | | | | | | | | | | | |
| --- | --- | --- | --- | --- | --- | --- | --- | --- | --- | --- | --- | --- |
| Boundary conditions | First order | | | | Second order | | | | Third order | | | |
| Result | Mean value | Standard deviation | Significant | Result | Mean value | Standard deviation | Significant | Result | Mean value | Standard deviation | Significant |
| C-C-F-F | 31.327 | 31.23 | 0.092 | ＜0.05 | 5.031 | 4.95 | 0.047 | ＜0.05 | 1.247 | 1.15 | 0.093 | ＜0.05 |
| 31.136 | 4.912 | 1.056 |
| 31.189 | 4.927 | 1.109 |
| 31,338 | 4.967 | 1.258 |
| 31.176 | 4.923 | 1.096 |
| C-C-C-F | 31.459 | 31.49 | 0.028 | ＜0.05 | 5.134 | 5.13 | 0.104 | ＜0.05 | 1.463 | 1.21 | 0.209 | ＜0.05 |
| 31.512 | 5.083 | 1.132 |
| 31.508 | 5.148 | 1.395 |
| 31.468 | 5.002 | 1.058 |
| 31.517 | 5.286 | 0.996 |
| C-C-C-C | 32.124 | 31.97 | 0.193 | ＜0.05 | 5.152 | 5.09 | 0.066 | ＜0.05 | 1.942 | 1.87 | 0.132 | ＜0.05 |
| 31.776 | 5.116 | 1.868 |
| 32.074 | 5.062 | 2.045 |
| 31.756 | 5.134 | 1.756 |
| 32.146 | 4.989 | 1.726 |

**(h)**

| Measure point D9 | | | | | | | | | | | | |
| --- | --- | --- | --- | --- | --- | --- | --- | --- | --- | --- | --- | --- |
| Boundary conditions | First order | | | | Second order | | | | Third order | | | |
| Result | Mean value | Standard deviation | Significant | Result | Mean value | Standard deviation | Significant | Result | Mean value | Standard deviation | Significant |
| C-C-F-F | 30.618 | 30.53 | 0.146 | ＜0.05 | 4.929 | 4.89 | 0.118 | ＜0.05 | 1.313 | 1.03 | 0.278 | ＜0.05 |
| 30.487 | 4.856 | 0.875 |
| 30.544 | 5.083 | 1.335 |
| 30.313 | 4.822 | 0.816 |
| 30.701 | 4.781 | 0.796 |
| C-C-C-F | 31.508 | 31.55 | 0.043 | ＜0.05 | 5.146 | 5.06 | 0.097 | ＜0.05 | 0.785 | 0.91 | 0.177 | ＜0.05 |
| 31.606 | 4.983 | 1.032 |
| 31.589 | 5.176 | 1.158 |
| 31.522 | 5.023 | 0.772 |
| 31.522 | 4.964 | 0.798 |
| C-C-C-C | 32.104 | 32.05 | 0.115 | ＜0.05 | 4.912 | 4.85 | 0.074 | ＜0.05 | 1.413 | 1.37 | 0.145 | ＜0.05 |
| 31.982 | 4.897 | 1.308 |
| 32.227 | 4.818 | 1.608 |
| 31.976 | 4.899 | 1.261 |
| 31.964 | 4.737 | 1.262 |

**(i)**

| Measure point D10 | | | | | | | | | | | | |
| --- | --- | --- | --- | --- | --- | --- | --- | --- | --- | --- | --- | --- |
| Boundary conditions | First order | | | | Second order | | | | Third order | | | |
| Result | Mean value | Standard deviation | Significant | Result | Mean value | Standard deviation | Significant | Result | Mean value | Standard deviation | Significant |
| C-C-F-F | 30.667 | 30.76 | 0.128 | ＜0.05 | 4.987 | 4.91 | 0.132 | ＜0.05 | 0.983 | 0.89 | 0.139 | ＜0.05 |
| 30.893 | 4.773 | 0.812 |
| 30.882 | 5.105 | 1.085 |
| 30.741 | 4.867 | 0.798 |
| 30.626 | 4.846 | 0.766 |
| C-C-C-F | 31.447 | 31.48 | 0.034 | ＜0.05 | 5.176 | 5.17 | 0.105 | ＜0.05 | 1.017 | 0.92 | 0.092 | ＜0.05 |
| 31.495 | 5.121 | 0.826 |
| 31.442 | 5.188 | 0.879 |
| 31.498 | 5.042 | 1.028 |
| 31.519 | 5.329 | 0.866 |
| C-C-C-C | 32.117 | 32.12 | 0.174 | ＜0.05 | 5.004 | 4.92 | 0.096 | ＜0.05 | 1.466 | 1.58 | 0.184 | ＜0.05 |
| 32.365 | 4.842 | 1.672 |
| 32.062 | 5.035 | 1.861 |
| 32.175 | 4.905 | 1.452 |
| 31.894 | 4.819 | 1.458 |

**(j)**

| Measure point D11 | | | | | | | | | | | | |
| --- | --- | --- | --- | --- | --- | --- | --- | --- | --- | --- | --- | --- |
| Boundary conditions | First order | | | | Second order | | | | Third order | | | |
| Result | Mean value | Standard deviation | Significant | Result | Mean value | Standard deviation | Significant | Result | Mean value | Standard deviation | Significant |
| C-C-F-F | 31.072 | 31.02 | 0.079 | ＜0.05 | 4.939 | 4.88 | 0.124 | ＜0.05 | 1.198 | 0.93 | 0.233 | ＜0.05 |
| 31.126 | 4.837 | 0.861 |
| 31.009 | 5.073 | 1.157 |
| 30.962 | 4.801 | 0.748 |
| 30.936 | 4.768 | 0.696 |
| C-C-C-F | 31.494 | 31.45 | 0.053 | ＜0.05 | 5.037 | 4.96 | 0.132 | ＜0.05 | 1.026 | 0.99 | 0.106 | ＜0.05 |
| 31.516 | 4.823 | 0.871 |
| 31.435 | 5.155 | 1.011 |
| 31.457 | 4.907 | 0.912 |
| 31.376 | 4.896 | 1.139 |
| C-C-C-C | 32.255 | 32.17 | 0.164 | ＜0.05 | 5.219 | 5.18 | 0.118 | ＜0.05 | 1.748 | 1.65 | 0.088 | ＜0.05 |
| 32.314 | 5.146 | 1.546 |
| 32.027 | 5.373 | 1.629 |
| 32.316 | 5.112 | 1.738 |
| 31.965 | 5.071 | 1.596 |

**(k)**

| Measure point D12 | | | | | | | | | | | | |
| --- | --- | --- | --- | --- | --- | --- | --- | --- | --- | --- | --- | --- |
| Boundary conditions | First order | | | | Second order | | | | Third order | | | |
| Result | Mean value | Standard deviation | Significant | Result | Mean value | Standard deviation | Significant | Result | Mean value | Standard deviation | Significant |
| C-C-F-F | 31.452 | 30.44 | 0.134 | ＜0.05 | 4.802 | 4.76 | 0.083 | ＜0.05 | 0.872 | 0.86 | 0.064 | ＜0.05 |
| 31.567 | 4.754 | 0.863 |
| 31.247 | 4.787 | 0.854 |
| 31.569 | 4.829 | 0.861 |
| 31.387 | 4.617 | 0.857 |
| C-C-C-F | 31.474 | 31.44 | 0.064 | ＜0.05 | 5.425 | 5.34 | 0.109 | ＜0.05 | 0.906 | 0.87 | 0.102 | ＜0.05 |
| 31.516 | 5.228 | 0.751 |
| 31.435 | 5.486 | 0.892 |
| 31.437 | 5.302 | 0.792 |
| 31.346 | 5.257 | 1.013 |
| C-C-C-C | 32.107 | 32.09 | 0.247 | ＜0.05 | 5.171 | 5.11 | 0.125 | ＜0.05 | 1.603 | 1.51 | 0.139 | ＜0.05 |
| 32.005 | 5.067 | 1.432 |
| 32.426 | 5.303 | 1.705 |
| 32.168 | 5.026 | 1.418 |
| 31.755 | 4.998 | 1.386 |

**(l)**
